# Supplementary material for: Design and application of a fluorescent probe based on ESIPT mechanism for the detection of Cys witho-hydroxyacetophenone structure
Source: Royal Society of Chemistry journal article supplement (doi:10.1039/c9ay00708c), 2019-01-01
Supplement: c9ay00708c1.pdf [file c9ay00708c1.pdf]

## Electronic supplementary information

### Design and application of a fluorescent probe based on ESIPT mechanism for the detection of Cys with *o*-hydroxyacetophenone structure

#### Experimental Section

##### Instrumentation and Reagents

Fluorescence spectra were obtained by a F-4600 fluorescence spectrometer (Hitachi, Japan). <sup>1</sup>H-NMR spectra were recorded on Avance III 500 NMR spectrometer (Bruker Daltonics Inc., Germany). Matrix-assisted laser desorption/ionization time of flight spectra (MALDI-TOF-MS) were performed on a Bruker Microflex TOF using DCTB as a matrix (Bruker Daltonics Inc., Germany). pH was measured on an INESA Scientific PHS-3C pH meter (INESA Scientific Instrument Co., Ltd., China). Cell imaging experiments were carried out on an LSM 710 laser scanning confocal microscope (Carl Zeiss, Oberkochen, Germany). All reagents were of analytical reagent grade and used without further purification or treatment. All aqueous solutions were prepared using ultrapure water obtained from a Milli-Q water purification system (18.2 MΩ cm).

##### Human serum samples and cells

Three human serum samples of volunteers were provided by the First Affiliated Hospital of Qiqihar Medical University (Qiqihar, China). All of the experiments were performed in compliance with the relevant laws and institutional guidelines of the People's Republic of China and the ethics committee of the First Affiliated Hospital of Qiqihar Medical University. The volunteer donors of the serum samples consented to the use of the samples for scientific research. The HepG2 cells were obtained from the

First Affiliated Hospital of Qiqihar Medical University.

### Synthesis of DHOA

DHO was synthesized according to the method described in the literature.<sup>1</sup> <sup>1</sup>H NMR (500 MHz, Chloroform-*d*)  $\delta$  12.69 (s, 1H), 7.97 – 7.88 (m, 2H), 7.84 – 7.73 (m, 4H), 7.69 (d,  $J = 15.4$  Hz, 1H), 7.59 – 7.50 (m, 1H), 7.08 (d,  $J = 8.7$  Hz, 1H), 7.00 (t,  $J = 7.6$  Hz, 1H), 3.22 (s, 6H). MALDI-TOF-MS:  $m/z$  267.266.

To a solution of DHO (0.267 g, 1 mmol) in anhydrous CH<sub>2</sub>Cl<sub>2</sub> (20 mL) was added triethylamine (0.5 mL) and acryloyl chloride (0.135 g, 1.5 mmol), respectively. The reaction mixture was stirred for 4 h at room temperature. The mixture was then poured into water and extracted with CH<sub>2</sub>Cl<sub>2</sub>. The combined organic layers were dried over Na<sub>2</sub>SO<sub>4</sub> and concentrated in vacuo. The crude product was purified using silica-gel chromatography with petroleum ether:ethyl acetate (3:1 v/v) as the eluent to afford DHOA (0.27 g, 85% yield). <sup>1</sup>H NMR (500 MHz, Chloroform-*d*)  $\delta$  7.69 (dd,  $J = 7.7, 1.7$  Hz, 1H), 7.56 – 7.51 (m, 2H), 7.48 (d,  $J = 8.7$  Hz, 2H), 7.37 (td,  $J = 7.6, 1.0$  Hz, 1H), 7.24 (dd,  $J = 8.2, 1.0$  Hz, 1H), 6.97 (d,  $J = 15.8$  Hz, 1H), 6.78 (d,  $J = 8.4$  Hz, 2H), 6.57 (dd,  $J = 17.2, 1.2$  Hz, 1H), 6.28 (dd,  $J = 17.3, 10.5$  Hz, 1H), 5.96 (dd,  $J = 10.6, 1.2$  Hz, 1H), 3.07 (s, 6H). <sup>13</sup>C NMR (126 MHz, Chloroform-*d*)  $\delta$  191.79, 164.33, 148.25, 146.55, 134.63, 133.22, 133.00, 131.73, 130.46, 129.75, 127.55, 126.01, 123.23, 120.99, 112.42, 40.53. MALDI-TOF-MS:  $m/z$  321.265.

### Fluorescence Measurements

The stock solution of DHO (1 mM) was prepared by dissolving an appropriate amount of probe in THF. HEPES buffer (1800  $\mu$ L, 50 mM, pH = 7.4) was mixed with DHO stock solution (10  $\mu$ L) in a 3-mL centrifuge tube. After that, Cys was added. The final volume of the solution was adjusted to 2 mL by ultra-pure water. The mixture was incubated at 37°C for 10 min to allow the reaction to take place.



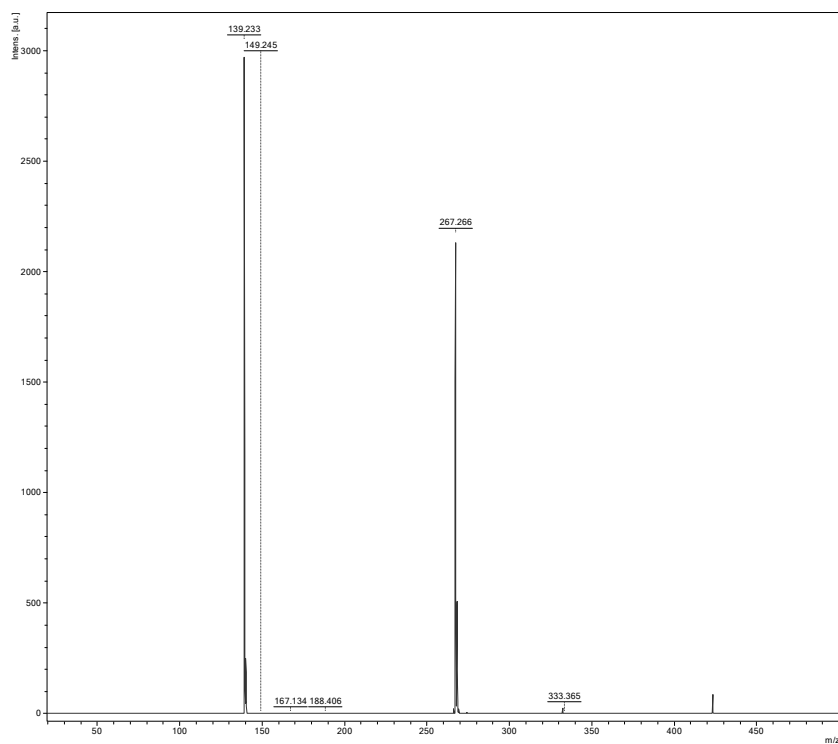

Fig. S2 MALDI-TOF-MS spectrum of DHO.

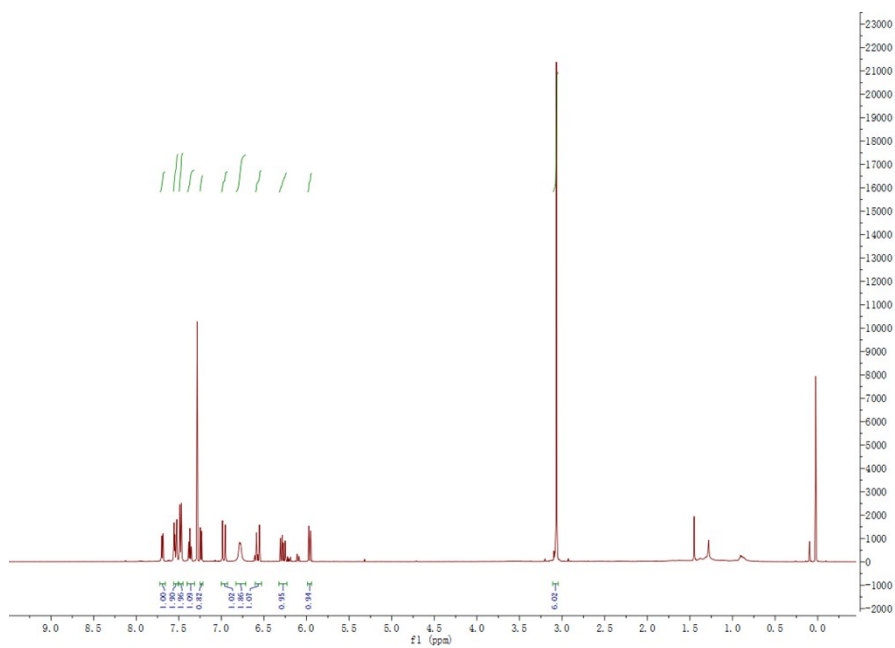

Fig. S3 <sup>1</sup>H NMR (500 MHz, DMSO-*d*<sub>6</sub>) of DHOA.

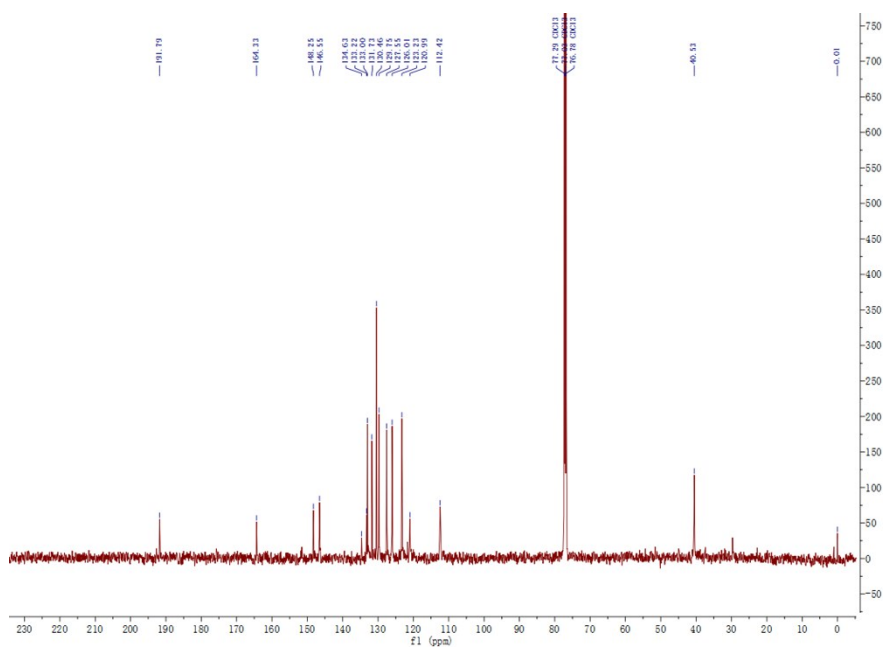

Fig. S4 <sup>13</sup>C NMR (126 MHz, Chloroform-*d*) of DHOA.

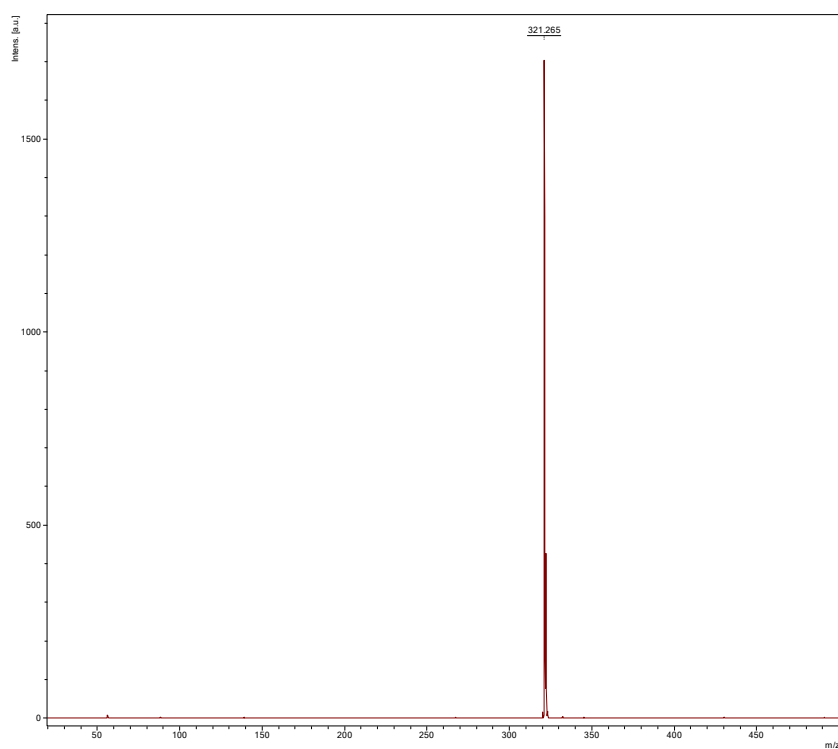

Fig. S5 MALDI-TOF-MS spectrum of DHOA.

## References

1. Z. Song, R. T. Kwok, E. Zhao, Z. He, Y. Hong, J. W. Lam, B. Liu and B. Z. Tang, *ACS Appl Mater Interfaces*, 2014, **6**, 17245-17254.
